# Supplementary material
Source: publisher figshare collection journal article supplement (https://acs.figshare.com/ndownloader/files/17848670)
Supplement: Supplementary file 1 [file 17848670]

## **MYCELIAL EFFECTS ON PHAGE RETENTION DURING TRANSPORT IN A MICROFLUIDIC PLATFORM**

Nawras Ghanem<sup>1</sup>, Claire E. Stanley<sup>2</sup>, Hauke Harms<sup>1,3</sup>, Antonis Chatzinotas<sup>1,3</sup> and Lukas Y. Wick<sup>1\*</sup>

*<sup>1</sup>Helmholtz Centre for Environmental Research - UFZ, Department of Environmental Microbiology, Permoserstraße 15, 04318 Leipzig, Germany.*

*<sup>2</sup>Agroecology and Environment Research Division, Agroscope, Reckenholzstrasse 191, 8046 Zurich, Switzerland*

*<sup>3</sup>German Centre for Integrative Biodiversity Research (iDiv) Halle-Jena-Leipzig, Deutscher Platz 5e, 04103 Leipzig, Germany*

Number of pages: 14

Number of figures: 2

Number of tables: 2

\* Corresponding author: Mailing address: Helmholtz Centre for Environmental Research - UFZ. Department of Environmental Microbiology; Permoserstrasse 15; 04318 Leipzig, Germany. phone: +49 341 235 1316, fax: +49 341 235 45 1316, e-mail: [lukas.wick@ufz.de](mailto:lukas.wick@ufz.de).

## ***MICROFLUIDIC DEVICE DESIGN AND PREPARATION***

Microfluidic devices were prepared as described in Stanley et al.<sup>1</sup> In brief: A polyester film photolithography mask (Micro Lithography Services Ltd., UK) and a 100 mm silicon wafer (Silicon Materials, Germany), spin-coated with a 10  $\mu\text{m}$  thick layer of SU-8 photoresist (MicroChem, USA), were used to create the master mold. The channel architecture was based on the fluid exchange device, detailed in Stanley et al.,<sup>2</sup> and enables active pumping of solutions into the observation chamber (Fig. 1). Two versions of the design were made, one that allows a mycelium to occupy the observation chamber and one that does not (Fig. S3). The latter design enables control measurements to be performed (i.e., in the absence of a mycelium). Polydimethylsiloxane (PDMS) silicone elastomer was then prepared and poured onto the master mold. PDMS was prepared using a 10:1 ratio of base to curing agent (Sylgard 184, Dow Corning, USA) that was mixed thoroughly and degassed prior to pouring. After curing overnight at 70 °C, the PDMS was removed from the mold and diced into slabs. A precision cutter (Syneo, USA), having a cutting edge diameter of 1.02 mm, was used to punch the holes for the medium inlet and outlet as illustrated in Fig. 1 and Fig. S3. The PDMS slabs were washed in 0.5 M sodium hydroxide, 70 % v/v ethanol, and sterile double distilled water (ddH<sub>2</sub>O) and then dried at 70 °C for 1 h. They were then bonded to glass-bottomed Petri dishes (World Precision Instruments) and sterilized for 20 minutes under ultraviolet light.

Fluorinated ethylene polymer (FEP) tubing (inner diameter: 0.80 mm, outer diameter: 1.60 mm; Cole-Parmer, Germany), hollow steel pin connectors (20 ga; Instech Laboratories, USA) and connector pins fitted with a luer-lock adaptor (20 ga; Instech Laboratories, USA) were used to connect the syringe to the microfluidic device and subsequently allow a variety of test solutions to be introduced into the observation channel (in the presence or absence of a mycelium). Fig. 1 shows an overview of the microfluidic setup for clarity.

## ***MICROFLUIDIC DEVICE: CHARACTERIZATION OF FLOW CONDITIONS***

The microfluidic device (channel height: 10  $\mu\text{m}$ ; channel width: 1000  $\mu\text{m}$ ; channel length: 6 mm) operates at laminar flow conditions (i.e. is a laminar flow reactor) with a Reynold's number ( $Re$ ) equal to ca. 0.003 (eq. S1).

$$Re = \frac{QD_H}{\nu A} = \frac{1.4 \times 10^{-12} \text{ m}^3/\text{s} \times 2 \times 10^{-5} \text{ m}}{1 \times 10^{-6} \text{ m}^2/\text{s} \times 1 \times 10^{-8} \text{ m}^2} = \frac{2.8 \times 10^{-17} \text{ m}^4/\text{s}}{1.0 \times 10^{-14} \text{ m}^4/\text{s}} = 0.003 \quad (\text{S1})$$

where:

$Q$  = volumetric flow rate ( $\text{m}^3/\text{s}$ ); i.e.:  $Q = 5 \mu\text{L h}^{-1} = 5 \times 10^{-6} \text{ L h}^{-1} = 1.4 \times 10^{-12} (\text{m}^3 \text{ s}^{-1})$

$D_H$  = hydraulic diameter (m),  $D_H = \frac{4 \times \text{cross sectional area}}{\text{wetted perimeter}} = \frac{4 \times 10000 \mu\text{m}^2}{2020 \mu\text{m}} = 20 \mu\text{m} = 2 \times 10^{-5} \text{ m}$

$\nu$  = kinematic viscosity ( $\text{m}^2/\text{s}$ ); i.e.  $1.0 \times 10^{-6} \text{ m}^2/\text{s}$  (for water)

$A$  = cross sectional area ( $\text{m}^2$ ); i.e.  $10,000 \mu\text{m}^2 = 1.0 \times 10^{-8} \text{ m}^2$

A syringe pump ensured that the volumetric flow rate in the microchannels is controlled by adjusting the pressure needed to produce the required flow rate independent of channel geometry.<sup>3</sup> As the microchannels within this microfluidic device have a rectangular profile (with a high width: height ratio, i.e.  $1000/10 = 100$ ), the velocity distribution profile across the microchannel is highly uniform.<sup>4</sup>

Hence, taking the average velocity of the system to be  $1.4 \times 10^{-4} \text{ m s}^{-1}$  (average velocity = volumetric flow rate / cross section area), we estimate that it would take ca. 43 seconds for the fluid to reach the outflow (i.e. to traverse the entire observation chamber) assuming a channel length of  $6 \times 10^{-3} \text{ m}$ .

### ***CALCULATION OF THE XDLVO INTERACTION ENERGIES OF PHAGE DEPOSITION***

The phage-mycelia interaction energy ( $G_{\text{XDLVO}}(h)$ ) at a distance  $h$  (nm) between two surfaces was calculated using the extended DLVO (XDLVO) theory (cf. eq. S2) based on the sphere-plate model.<sup>5</sup> The XDLVO theory thereby is an extension of the DLVO approach, which is the sum of  $G_{\text{EDL}}$ ,  $G_{\text{LW}}$  and the Born repulsion energy  $G_{\text{Born}}$ . In the XDLVO theory, the energy  $G_{\text{XDLVO}}(h)$  is composed of the electrostatic repulsion ( $G_{\text{EDL}}$ ), the Lifshitz-van der Waals ( $G_{\text{LW}}$ )<sup>6</sup> and the acid-base ( $G_{\text{AB}}$ ) interaction energy (eq. S2).<sup>5</sup>

$$G_{\text{XDLVO}}(h) = G_{\text{AB}} + G_{\text{EDL}}(h) + G_{\text{LW}}(h) \quad (\text{S2})$$

The DLVO approach does not consider the polar forces that are supposed to be dominant forces between particles in polar media.<sup>7</sup> Additionally, the acid-base ( $G_{\text{AB}}$ ) interaction energy was reported in many studies to be essential in explaining the interaction behavior between approached particles.<sup>5,8</sup>

### ***Acid-base interaction energy ( $G_{\text{AB}}$ )***

Eq. S3 was applied to calculate the acid-base interaction energy ( $G_{\text{AB}}$ ):<sup>9,5</sup>

$$G_{\text{AB}}(h) = 2\pi a_p \Delta G^{\text{AB}} \lambda \exp\left(-\frac{l_0 - h}{\lambda}\right) \quad (\text{S3})$$

Where  $a_p$  is the radius of phages, and  $h$  is the separation distance between the phage and the mycelial surface. The  $\lambda$  is the characteristic decay length of AB interaction in water (estimated to be 0.6 nm).<sup>10</sup> The acid-base interaction energy depends on the Gibbs free energy of the phage and the fungus as given by eq. S3.  $\Delta G^{\text{AB}}$  is the acid-base component of the free energy interaction at contact given by eq. S4:<sup>10,7</sup>

$$\Delta G^{\text{AB}} = [2(\sqrt{\gamma_P^+} - \sqrt{\gamma_F^+})(\sqrt{\gamma_P^-} - \sqrt{\gamma_F^-}) - (\sqrt{\gamma_P^+} - \sqrt{\gamma_I^+})(\sqrt{\gamma_P^-} - \sqrt{\gamma_I^-}) - (\sqrt{\gamma_F^+} - \sqrt{\gamma_I^+})(\sqrt{\gamma_F^-} - \sqrt{\gamma_I^-})] \quad (\text{S4})$$

The surface Gibbs free energy of phage  $\gamma_P$  and the fungal  $\gamma_F$  surfaces ( $\text{mJ m}^{-2}$ ) were calculated based on the measured contact angles ( $\theta$ ) of phages, membrane filters and fungal surfaces using water, formamide and methylene iodide as liquids by applying the Young equation according to eq. S5:

$$\cos(\theta) = -1 + 2\frac{\sqrt{\gamma_P^{LW}\gamma_I^{LW}}}{\gamma_I^{total}} + 2\frac{\sqrt{\gamma_P^+ \gamma_I^-}}{\gamma_I^{total}} + 2\frac{\sqrt{\gamma_P^- \gamma_I^+}}{\gamma_I^{total}} \quad (\text{S5})$$

The total surface Gibbs free energy ( $\gamma^{total}$ ) is separated in a Lifshitz-van der Waals ( $\gamma^{LW}$ ) and an acid-base component ( $\gamma^{AB}$ ) and is represented by eq. S6. The electron acceptor and the electron donor components of acid-base surface energy  $\gamma^+$  and  $\gamma^-$  is shown in eq. S7.

$$\gamma^{total} = \gamma^{AB} + \gamma^{LW} \quad (\text{S6})$$

$$\gamma_i^{AB} = 2\sqrt{\gamma_i^+ \gamma_i^-} \quad (\text{S7})$$

Following van Oss et al.<sup>11</sup> we calculated the phage parameters  $\gamma_p$ ,  $\gamma_p^{LW}$ ,  $\gamma_p^+$ ,  $\gamma_p^-$ , while literature data was utilized for water, formamide and methyleneiodide.<sup>12</sup>

### ***Electrostatic repulsion energy ( $G_{EDL}$ )***

Eq. S8 was applied to calculate the electrostatic repulsion energy between phages and the fungal surface.<sup>13</sup>

$$G_{EDL} = \pi\epsilon_0\epsilon_r a_p \{ 2\zeta_p \zeta_F \ln \left[ \frac{1 + \exp(-\kappa h)}{1 - \exp(-\kappa h)} \right] + (\zeta_p^2 + \zeta_F^2) \ln [1 - \exp(-2\kappa h)] \} \quad (\text{S8})$$

where  $\kappa^{-1}$  is the thickness of the electrical double layer (EDL, nm) as calculated by the Guoy-Chapman theory with  $C$  and  $z$  being the molar bulk concentration and the charge number of the electrolytes, respectively (eq. S9).

$$\kappa^{-1} = [3.29zC^{1/2}]^{-1} \quad (\text{S9})$$

For a 100 mM buffer solution a  $\kappa^{-1}$  of 0.65 nm was calculated.<sup>12</sup>

### ***Lifshitz-van der Waals interaction energy ( $G_{LW}$ )***

Using the values of the effective Hamaker constant (eq. S11), the Lifshitz-van der Waals interaction energy can be approximated by eq. S10:<sup>7,12</sup>

$$G_{LW} = -\frac{A_{132}}{6} \left[ \frac{2a_p(h + a_p)}{h(h + a_p)} - \ln \left( \frac{h + 2a_p}{h} \right) \right] \quad (\text{S10})$$

The Hamaker constant  $A_{132}$  is described by eq. S11:<sup>14</sup>

$$A_{123} = (\sqrt{A_{11}} - \sqrt{A_{33}})(\sqrt{A_{22}} - \sqrt{A_{33}}) \quad (\text{S11})$$

Here,  $A_{ii}$  denotes the individual Hamaker constant for phages ( $A_{11}$ ), hyphae ( $A_{22}$ ) and water ( $A_{33}$ ).  $A_{33}$  was taken from the literature,<sup>14</sup> while  $A_{11}$  and  $A_{22}$  were calculated by eq. S12.

$$A_{ii} = 6\pi l_0^2 \gamma_i^{LW} \quad (S12)$$

According to Fowkes,<sup>15</sup> the value of  $6\pi l_0^2$  equals  $1.44 \times 10^{-18} \text{ m}^2$ , with  $l_0$  being the equilibrium separation distance between the phage and the fungus (0.157 nm).<sup>11</sup>

**Table S1.** Overview of the surface Gibbs free energy ( $\gamma$ ) and the contact angles of water ( $\theta_w$ ), formamide ( $\theta_f$ ) and methylene iodide ( $\theta_m$ ) for the phages and hyphae studied.

| Name                       | Contact angle ( $\theta$ ) |            |            | Surface free energy ( $\text{mJ m}^{-2}$ ) <sup>1</sup> |            |                      |                      |                       |
|----------------------------|----------------------------|------------|------------|---------------------------------------------------------|------------|----------------------|----------------------|-----------------------|
|                            | $\theta_w$                 | $\theta_f$ | $\theta_m$ | $\gamma^+$                                              | $\gamma^+$ | $\gamma^{\text{AB}}$ | $\gamma^{\text{LW}}$ | $\gamma^{\text{Tot}}$ |
| water                      | -                          | -          | -          | 25.5*                                                   | 25.50*     | 51.0*                | 21.8*                | 72.8*                 |
| formamide                  | -                          | -          | -          | 39.6*                                                   | 2.30*      | 19.0*                | 39.0*                | 58.0*                 |
| methylene iodide           | -                          | -          | -          | < 0.1*                                                  | < 0.1*     | $\approx 0^*$        | 50.8*                | 50.8*                 |
| membrane filter Anodisc 25 | 23                         | -          | -          | -                                                       | -          | -                    | -                    | -                     |
| T4                         | 95                         | 61         | 40         | 0.1                                                     | 0.30       | 0.2                  | 39.5                 | 39.7                  |
| PSA-HS2                    | 40                         | 31         | 43         | 34.6                                                    | 0.96       | 11.5                 | 38.0                 | 49.5                  |
| <i>Pythium ultimum</i>     | 62                         | 47         | 72         | 17.3                                                    | 4.49       | 17.6                 | 21.8                 | 39.4                  |
| <i>Coprinopsis cinerea</i> | 131                        | 106        | 131        | 0.0                                                     | 4.47       | 0.2                  | 1.5                  | 1.7                   |

\* Surface free energy data for water, formamide and methylene iodide taken from.<sup>12</sup>

**Table S2.** Composition of the YMG and CCMM media use for *C. cinerea*.<sup>1</sup>

| Medium                                  | Composition                                                                                                                                                                                                                                                                                                                                                                                                                                                                   |
|-----------------------------------------|-------------------------------------------------------------------------------------------------------------------------------------------------------------------------------------------------------------------------------------------------------------------------------------------------------------------------------------------------------------------------------------------------------------------------------------------------------------------------------|
| Yeast-malt extract-glucose (YMG) medium | 0.4 % w/v yeast extract, 1 % w/v malt extract, 0.4 % w/v glucose, 1.5 % w/v agar                                                                                                                                                                                                                                                                                                                                                                                              |
| <i>C. cinerea</i> minimal medium (CCMM) | 5 g L <sup>-1</sup> glucose, 2 g L <sup>-1</sup> asparagine, 50 mg L <sup>-1</sup> adenine sulfate, 1 g L <sup>-1</sup> KH <sub>2</sub> PO <sub>4</sub> , 2.25 g L <sup>-1</sup> Na <sub>2</sub> HPO <sub>4</sub> , 0.29 g L <sup>-1</sup> Na <sub>2</sub> SO <sub>4</sub> , 0.5 g L <sup>-1</sup> 2di-ammonium tartrate, 0.04 mg L <sup>-1</sup> thiamine hydrochloride, 0.25 g L <sup>-1</sup> MgSO <sub>4</sub> , 5 mg L <sup>-1</sup> <i>p</i> -aminobenzoic acid (pABA). |

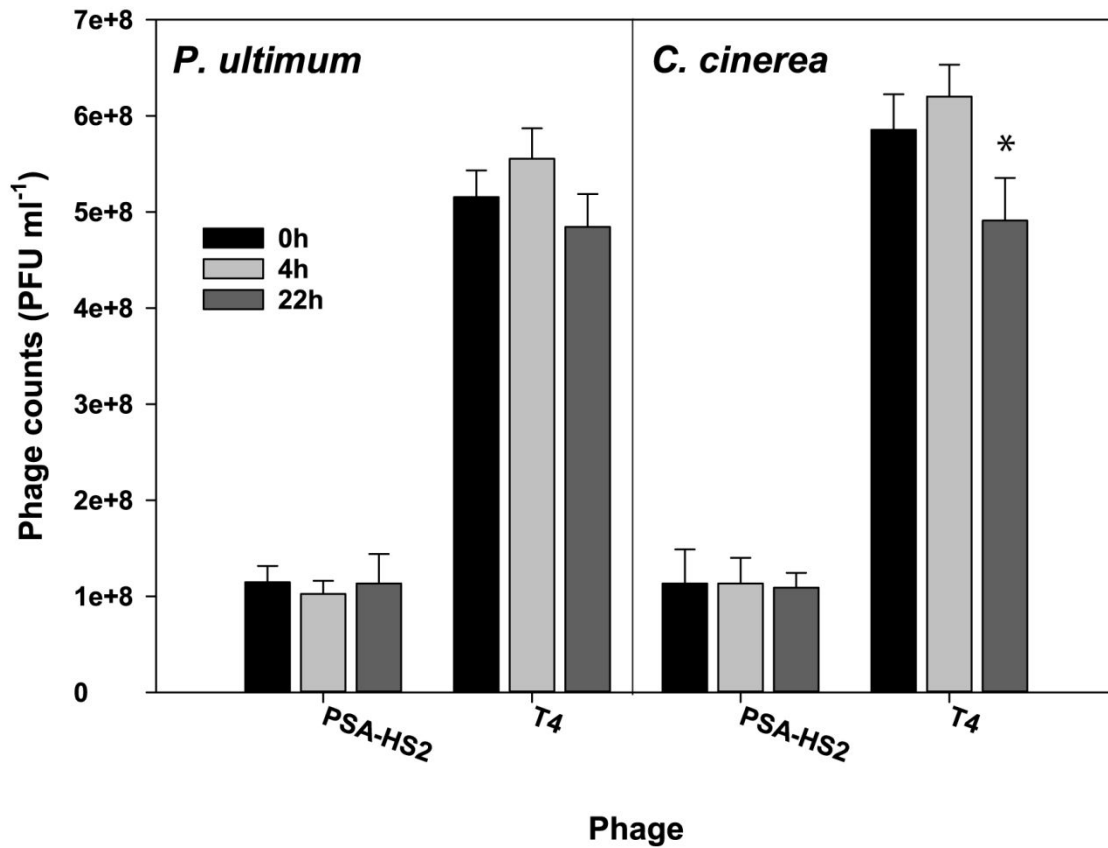

**Figure S1.** Stability and viability of the PSA-HS2 and T4 phage suspensions after exposure to *P. ultimum* and *C. cinerea* conditioned media (at  $t = 0, 4$  and  $22$  h). The results represent the average and standard deviations of triplicate experiments using phage quantification by PFU. T4 counts in the presence of *C. cinerea* conditioned medium at  $t = 22$  h were statistically different to initial concentrations at  $t = 0$  and  $t = 4$  h, as indicated by the asterisk ( $p \leq 0.05$ ).



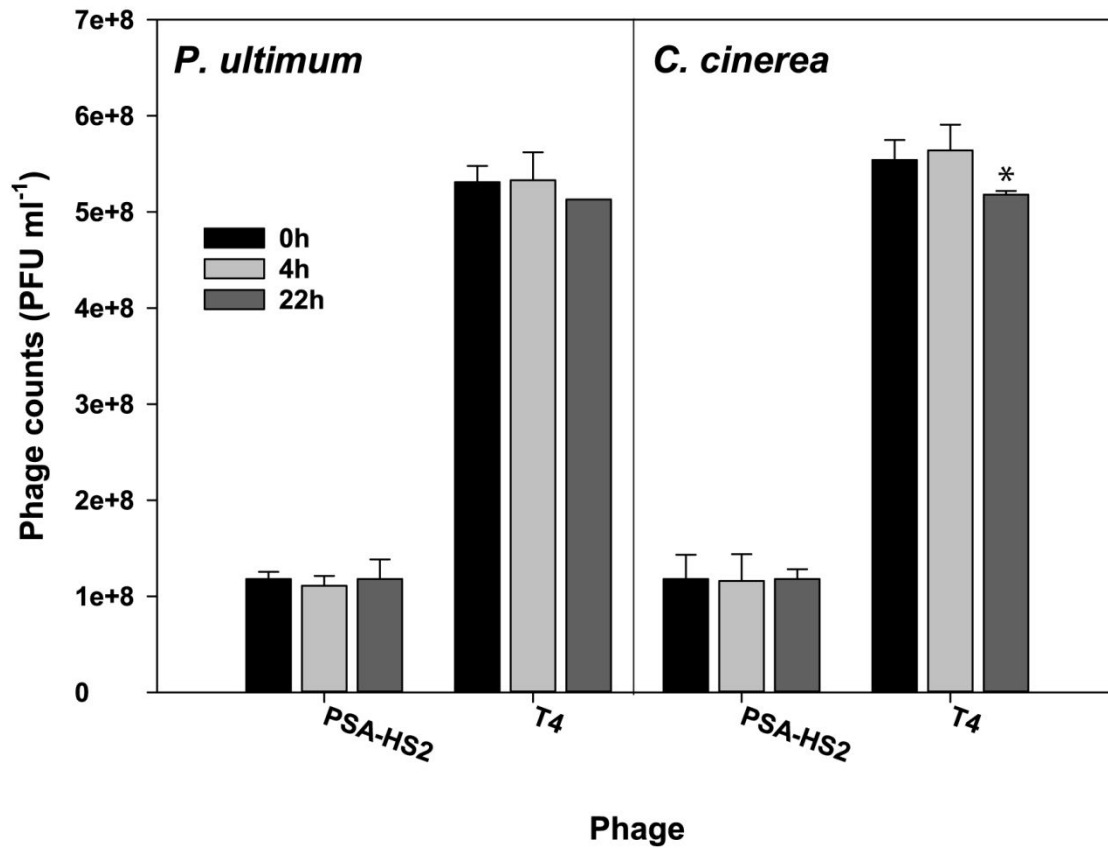

**Figure S2.** Stability and viability of the PSA-HS2 and T4 phage suspensions after exposure to fresh media i.e. LB and CCMM media for *P. ultimum* and *C. cinerea*, respectively at  $t = 0, 4$  and  $22$  h. The results represent the average and standard deviations of triplicate experiments using phage quantification by PFU. T4 counts in the presence of *C. cinerea* conditioned medium at  $t = 22$  h were statistically different to initial concentrations at  $t = 0$  and  $t = 4$  h, as indicated by the asterisk ( $p \leq 0.05$ ).

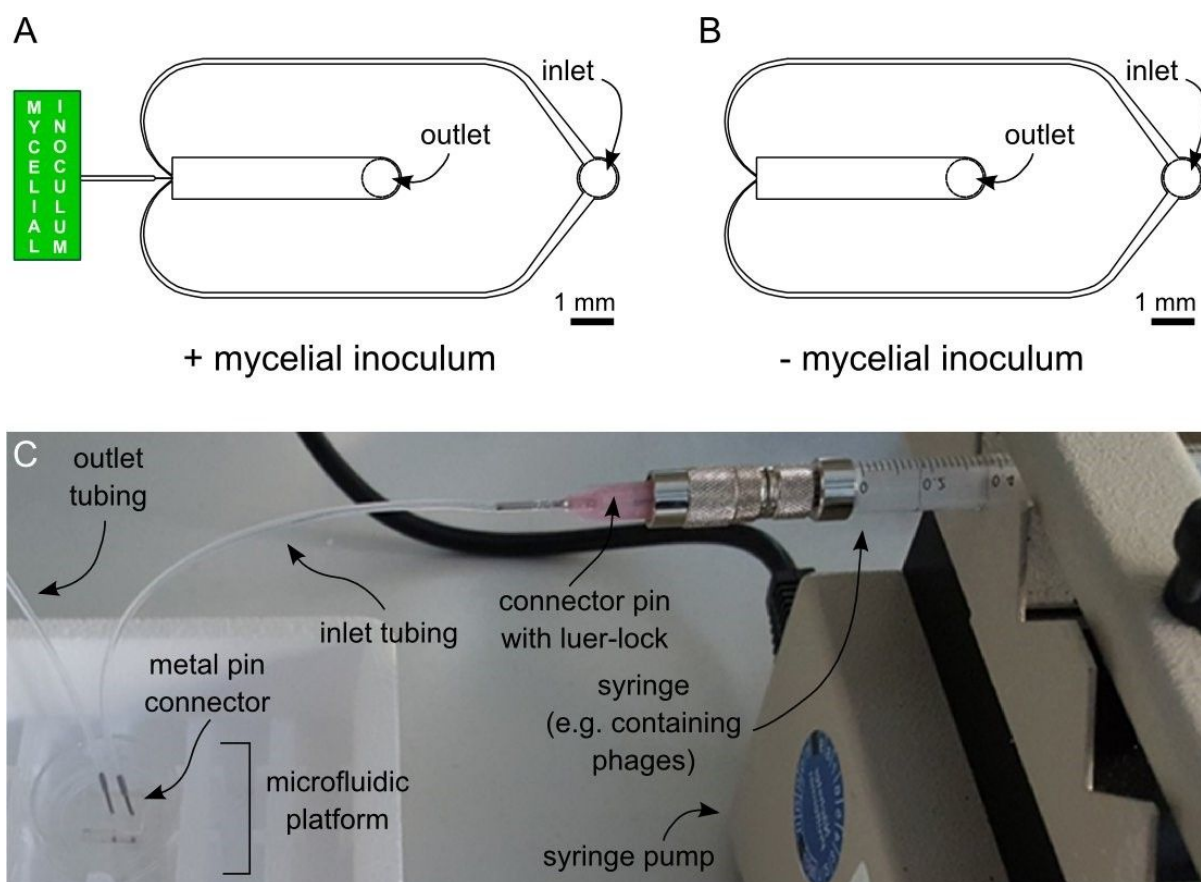

**Figure S3.** Design and operation of the experimental setup. (A) Two-dimensional representation of the microfluidic platform with a mycelial inoculum that was placed next to the lateral opening of the microfluidic device, allowing hyphae to penetrate and grow into the observation channel via a constriction channel. (B) Two-dimensional representation of the microfluidic platform that enables control measurements to be performed (i.e. in the absence of a mycelium). (C) Photograph illustrating the experimental setup, where a syringe pump was used to drive phage suspensions into the microfluidic channels in the presence and absence of mycelia.

## REFERENCES

- (1) Stanley, C. E.; Stöckli, M.; Swaay, D. van; Sabotič, J.; Kallio, P. T.; Künzler, M.; deMello, A. J.; Aebi, M. Probing Bacterial–fungal Interactions at the Single Cell Level. *Integr. Biol.* **2014**, *6* (10), 935–945. <https://doi.org/10.1039/C4IB00154K>.
- (2) Stanley, C.; Shrivastava, J.; Brugman, R.; Heinzelmann, E.; Frajs, V.; Bühler, A.; van Swaay, D.; Grossmann, G. Fabrication and Use of the Dual-Flow-RootChip for the Imaging of Arabidopsis Roots in Asymmetric Microenvironments. *BIO-PROTOCOL* **2018**, *8* (18). <https://doi.org/10.21769/BioProtoc.3010>.
- (3) Mavrogiannis, N.; Ibo, M.; Fu, X.; Crivellari, F.; Gagnon, Z. Microfluidics Made Easy: A Robust Low-Cost Constant Pressure Flow Controller for Engineers and Cell Biologists. *Biomicrofluidics* **2016**, *10* (3). <https://doi.org/10.1063/1.4950753>.
- (4) Stone, H. A. Introduction to Fluid Dynamics for Microfluidic Flows. In *CMOS Biotechnology*, Lee, H., Westervelt, R. M., Ham, D., Eds.; Series on Integrated Circuits and Systems; Springer US: Boston, MA, 2007; pp 5–30. [https://doi.org/10.1007/978-0-387-68913-5\\_2](https://doi.org/10.1007/978-0-387-68913-5_2).
- (5) Chrysikopoulos, C. V.; Syngouna, V. I. Attachment of Bacteriophages MS2 and  $\Phi$ X174 onto Kaolinite and Montmorillonite: Extended-DLVO Interactions. *Colloids and Surfaces B: Biointerfaces* **2012**, *92*, 74–83. <https://doi.org/10.1016/j.colsurfb.2011.11.028>.
- (6) Hermansson, M. The DLVO Theory in Microbial Adhesion. *Colloids and Surfaces B: Biointerfaces* **1999**, *14* (1), 105–119.
- (7) Van Oss, C. J.; Giese, R. F.; Costanzo, P. M. DLVO and Non-DLVO Interactions in Hectorite. *Clays Clay Miner* **1990**, *38* (2), 151–159.
- (8) Attinti, R.; Wei, J.; Kniel, K.; Sims, J. T.; Jin, Y. Virus' (MS2,  $\Phi$ X174, and Aichi) Attachment on Sand Measured by Atomic Force Microscopy and Their Transport through Sand Columns. *Environmental Science & Technology* **2010**, *44* (7), 2426–2432. <https://doi.org/10.1021/es903221p>.
- (9) Tadros, T. Interfacial Forces in Aqueous Media, Carel J. van Oss, Marcel Dekker Inc., New York, 1994. *J. Chem. Technol. Biotechnol.* **1995**, *64* (3), 311–311. <https://doi.org/10.1002/jctb.280640321>.

- (10) van Oss, C. J.; Docoslis, A.; Wu, W.; Giese, R. F. Influence of Macroscopic and Microscopic Interactions on Kinetic Rate Constants: I. Role of the Extended DLVO Theory in Determining the Kinetic Adsorption Constant of Proteins in Aqueous Media, Using von Smoluchowski's Approach. *Colloids and Surfaces B: Biointerfaces* **1999**, *14* (1–4), 99–104. [https://doi.org/10.1016/S0927-7765\(99\)00028-4](https://doi.org/10.1016/S0927-7765(99)00028-4).
- (11) Van Oss, C. J.; Chaudhury, M. K.; Good, R. J. Interfacial Lifshitz-van Der Waals and Polar Interactions in Macroscopic Systems. *Chemical Reviews* **1988**, *88* (6), 927–941.
- (12) Sharma, P. K.; Hanumantha Rao, K. Adhesion of *Paenibacillus Polymyxa* on Chalcopyrite and Pyrite: Surface Thermodynamics and Extended DLVO Theory. *Colloids and Surfaces B: Biointerfaces* **2003**, *29* (1), 21–38. [https://doi.org/10.1016/S0927-7765\(02\)00180-7](https://doi.org/10.1016/S0927-7765(02)00180-7).
- (13) Boks, N. P.; Norde, W.; van der Mei, H. C.; Busscher, H. J. Forces Involved in Bacterial Adhesion to Hydrophilic and Hydrophobic Surfaces. *Microbiology* **2008**, *154* (10), 3122–3133. <https://doi.org/10.1099/mic.0.2008/018622-0>.
- (14) Van Oss, C. J.; Good, R. J.; Chaudhury, M. K. The Role of van Der Waals Forces and Hydrogen Bonds in “Hydrophobic Interactions” between Biopolymers and Low Energy Surfaces. *Journal of Colloid and Interface Science* **1986**, *111* (2), 378–390. [https://doi.org/10.1016/0021-9797\(86\)90041-X](https://doi.org/10.1016/0021-9797(86)90041-X).
- (15) Fowkes, F. M. Attractive Forces at Interfaces. *Industrial & Engineering Chemistry* **1964**, *56* (12), 40–52.
